# Supplementary material for: Targeted genome fragmentation with CRISPR/Cas9 enables fast and efficient enrichment of small genomic regions and ultra-accurate sequencing with low DNA input (CRISPR-DS)
Source: HighWire-hosted journal article supplement (doi:10.1101/gr.235291.118), 2018-09-19
Supplement: Supplemental_Code_S1.zip [file TP53_crRNA_sequences_and_cut_coordinates.xlsx]

## Sheet: Sheet1
crRNA sequences for TP53 CRISPR-Cas9 digestion
Target description:	Name:	Sequence plus pam site:	Position start:	Position end:	Zhang score
TP53 - upstream of exon 11	TP53e11_US	GTGGGCCCCTACCTAGAATGTGG	7572606	7572628	79
TP53 - downstream of exon 11	TP53e11_DS	ATTCCCGTTGTCCCAGCCTTAGG	7573118	7573096	70
TP53 - upstream of exon 10	TP53e10_US	TGGTTATAGGATTCAACCGGAGG	7573754	7573776	91
TP53 - downstream of exon 10	TP53e10_DS	CTGATTGCAATCTCCGCCTCTGG	7574261	7574283	86
TP53 - upstream of exons 9-8	TP53e9-8_DS	CGGCATTTTGAGTGTTAGACTGG	7576792	7576814	80
TP53 - downstream of exons 9-8	TP53e9-8_US	CTTTGGGACCTCTTAACCTGTGG	7577324	7577302	80
TP53 - downstream of exon 7	TP53e7_DS.v2	CAGGTCTCCCCAAGGCGCACTGG	7577660	7577638	81
TP53 - upstream of exons 6-5	TP53e6-5_US	GCACATCTCATGGGGTTATAGGG	7578050	7578072	84
TP53 - downstream of exons 6-5	TP53e6-5_DS	CAGGGGAGTACTGTAGGAAGAGG	7578545	7578567	61
TP53 - upstream of exons 4-3	TP53e4-3_US.v2	TGCACGGTCAGTTGCCCTGAGGG	7579317	7579295	81
TP53 - downstream of exons 4-3	TP53e4-3_DS	ATGGAATTTTCGCTTCCCACAGG	7579751	7579773	79
TP53 - downstream of exon 2	TP53e2_DS	TGGGAATAGGGTGCACATTTAGG	7580242	7580220	66
