# Supplementary material for: Targeted genome fragmentation with CRISPR/Cas9 enables fast and efficient enrichment of small genomic regions and ultra-accurate sequencing with low DNA input (CRISPR-DS)
Source: HighWire-hosted journal article supplement (doi:10.1101/gr.235291.118), 2018-09-19
Supplement: Supplemental_Figures.pdf [file Supplemental_Figures.pdf]

## **SUPPLEMENTAL FIGURES**

Figure S1. Timeline of library preparation for CRISPR-DS and standard-DS

Figure S2. Homopolymer region produces suboptimal sequencing near *TP53* exon 7

Figure S3. Fraction of reads within 10% of optimal insert size: CRISPR-DS vs standard-DS

Figure S4. Target enrichment for CRISPR-DS with one vs. two captures

Figure S5. Pre-enrichment for high molecular weight DNA with BluePippin

Figure S6. Comparison of mutant allele fraction detected by CRISPR-DS and standard-DS

Figure S7. Comparison of *TP53* biological background mutation frequency measured by Standard-DS and CRISPR-DS

Figure S8. Overview of CRISPR-DS data processing

Figure S9. Control CRISPR/Cas9 digestion of *TP53* gRNAs

# Supplemental Figure S1

|       | CRISPR-DS                                                               | Time Required (min)     | Active Time Required (min) | ~TOTAL Time required (hrs) | Standard-DS                                                    | Time Required (min)     | Active Time Required (min) | ~TOTAL Time required (hrs) |
|-------|-------------------------------------------------------------------------|-------------------------|----------------------------|----------------------------|----------------------------------------------------------------|-------------------------|----------------------------|----------------------------|
|       | Preparation time: design of locus specific gRNA and biotinylated probes |                         |                            |                            | Preparation time: design of locus specific biotinylated probes |                         |                            |                            |
| Day 1 |                                                                         |                         |                            | 0.5                        | Prepare to Sonicate                                            | 45                      | 15                         | 5.2                        |
|       |                                                                         |                         |                            |                            | Sonicate                                                       | 3                       | 3                          |                            |
|       |                                                                         |                         |                            |                            | Prepare ERAT                                                   | 10                      | 10                         |                            |
|       |                                                                         |                         |                            |                            | End repair                                                     | 60                      | -                          |                            |
|       |                                                                         |                         |                            |                            | Prepare ligation                                               | 10                      | 10                         |                            |
|       |                                                                         |                         |                            |                            | Ligation                                                       | 15                      | -                          |                            |
|       |                                                                         |                         |                            |                            | 0.8X Ampure BW                                                 | 20                      | 20                         |                            |
|       |                                                                         |                         |                            |                            | Prepare PCR                                                    | 10                      | 10                         |                            |
|       |                                                                         |                         |                            |                            | PCR                                                            | 20                      | -                          |                            |
|       |                                                                         |                         |                            |                            | 0.8X Ampure BW                                                 | 20                      | 20                         |                            |
|       |                                                                         |                         |                            |                            | Prepare Wash Buffers                                           | 10                      | 10                         |                            |
|       |                                                                         |                         |                            |                            | Prepare Samples                                                | 10                      | 10                         |                            |
|       | Prepare Cas9 Digest                                                     | 30                      | 30                         | Lyophilize                 | 60                                                             | -                       |                            |                            |
|       |                                                                         |                         |                            | Prepare to hybridize       | 20                                                             | 20                      |                            |                            |
|       | Overnight CRISPR-Cas9 Digestion                                         |                         |                            |                            | Overnight Hybridization                                        |                         |                            |                            |
| Day 2 | 0.5X Ampure BW                                                          | 15                      | 15                         | 5                          | Heated Washes                                                  | 120                     | 120                        | 5.2                        |
|       | 1.8X Ampure BW                                                          | 20                      | 20                         |                            | Prepare                                                        | 10                      | 10                         |                            |
|       | Prepare ERAT                                                            | 10                      | 10                         |                            | PCR                                                            | 60                      | -                          |                            |
|       | End repair                                                              | 60                      | -                          |                            | 0.8X Ampure BW                                                 | 20                      | 20                         |                            |
|       | Prepare ligation                                                        | 10                      | 10                         |                            | Prepare Wash Buffers                                           | 10                      | 10                         |                            |
|       | Ligation                                                                | 15                      | -                          |                            | Prepare Samples                                                | 10                      | 10                         |                            |
|       | 0.8X Ampure BW                                                          | 20                      | 20                         |                            | Lyophilize                                                     | 60                      | -                          |                            |
|       | Prepare PCR                                                             | 10                      | 10                         |                            | Prepare to hybridize                                           | 20                      | 20                         |                            |
|       | PCR                                                                     | 20                      | -                          |                            |                                                                |                         |                            |                            |
|       | 0.8X Ampure BW                                                          | 20                      | 20                         |                            |                                                                |                         |                            |                            |
|       | Prepare Wash Buffers                                                    | 10                      | 10                         |                            |                                                                |                         |                            |                            |
|       | Prepare Samples                                                         | 10                      | 10                         |                            |                                                                |                         |                            |                            |
|       | Lyophilize                                                              | 60                      | -                          |                            |                                                                |                         |                            |                            |
|       | Prepare to hybridize                                                    | 20                      | 20                         |                            |                                                                |                         |                            |                            |
|       |                                                                         | Overnight Hybridization |                            |                            |                                                                | Overnight Hybridization |                            |                            |
| Day 3 | Heated Washes                                                           | 120                     | 120                        | 3.5                        | Heated Washes                                                  | 120                     | 120                        | 3.5                        |
|       | Prepare PCR                                                             | 10                      | 10                         |                            | Prepare PCR                                                    | 10                      | 10                         |                            |
|       | PCR                                                                     | 60                      | -                          |                            | PCR                                                            | 60                      | -                          |                            |
|       | 0.8X Ampure BW                                                          | 20                      | 20                         |                            | 0.8X Ampure BW                                                 | 20                      | 20                         |                            |
|       | * Ready to Sequence*                                                    |                         |                            |                            | * Ready to Sequence*                                           |                         |                            |                            |

**Figure S1.** Timeline of library preparation for CRISPR-DS and standard-DS. CRISPR-DS reduces the time required for library preparation by nearly an entire day, with just a short set-up for the CRISPR/Cas9 digestion on Day 1. ERAT: End-Repair and A-Tailing; BW; bead wash. Note: These times are approximations

## Supplemental Figure S2

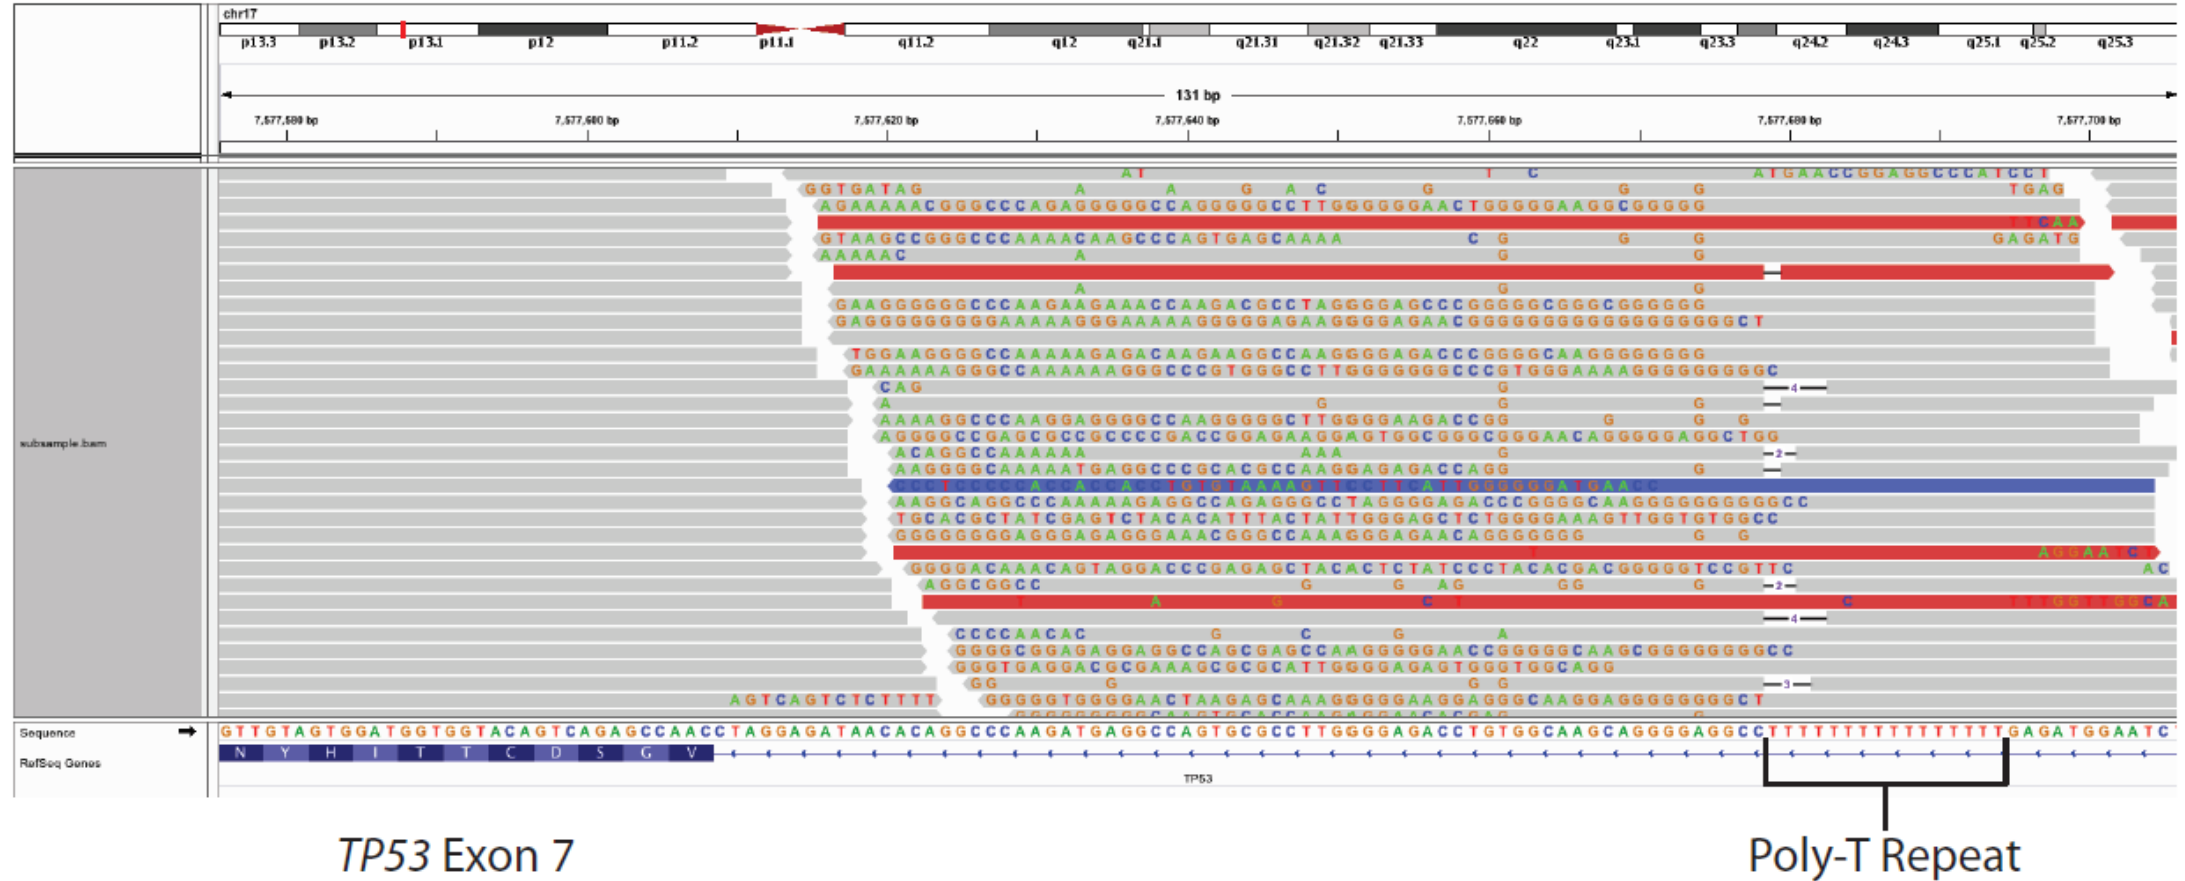

**Figure S2.** Homopolymer region produces suboptimal sequencing near *TP53* exon 7. The IGV plot shows suboptimal sequencing quality in standard-DS reads that contain the Poly-T repeat. To avoid this problem, the CRISPR-DS gRNA had to be placed in the small region between the Poly-T repeat and the beginning of exon 7, constraining the size of that fragment.

## Supplemental Figure S3

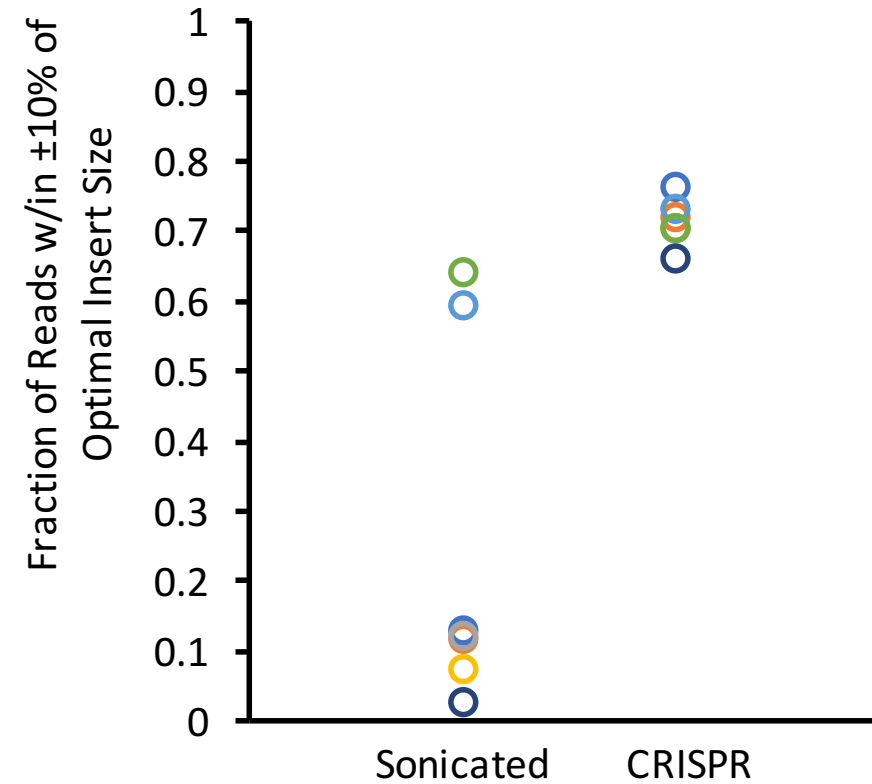

**Figure S3.** Fraction of reads within 10% of optimal insert size: CRISPR-DS vs standard-DS. The fraction of reads within 10% of optimal insert size corresponds to the yellow highlighted regions in Fig. 4b, c. Markers with matching colors between the two fragmentation methods represent the same sample. This comparison includes seven samples in the study that were analyzed with both methods: 4 peritoneal fluid DNAs (Table 2) and one normal bladder control DNA processed with 250ng, 100ng, and 25ng input DNA (Figure 5).

## Supplemental Figure S4

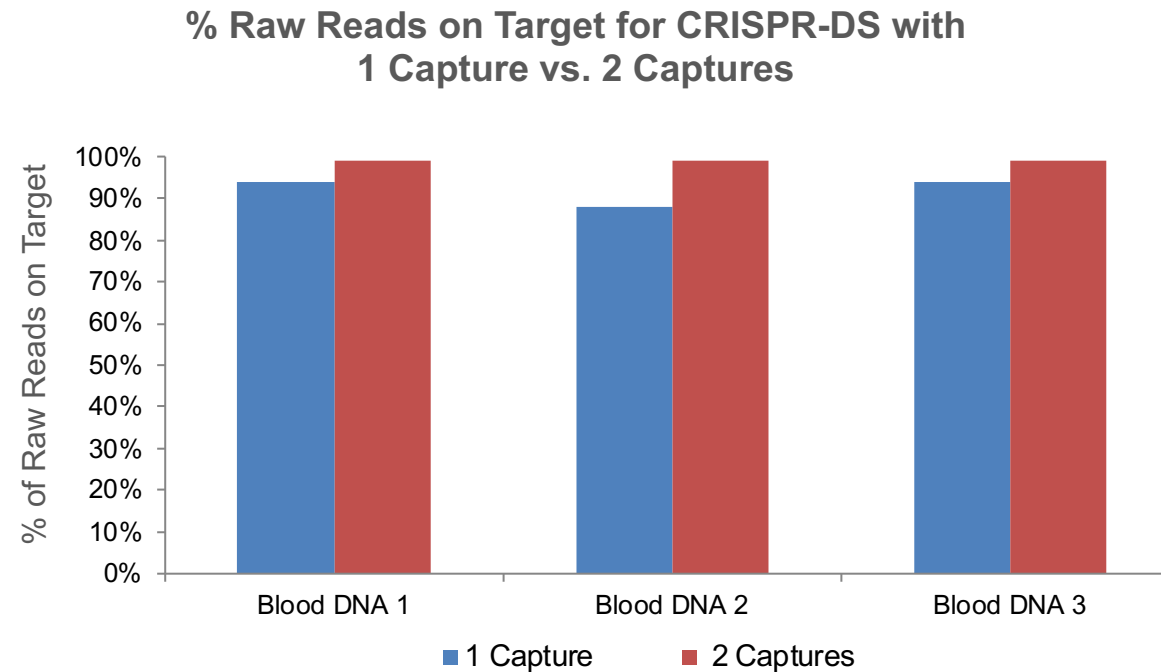

**Figure S4.** Target enrichment for CRISPR-DS with one vs. two captures. Three de-identified blood DNA samples were processed for CRISPR-DS and split in half after one hybridization capture. The first half was indexed and sequenced and the second half was subject to an additional round of capture, as required in the original DS protocol. After one capture, all three samples had nearly ~90% of raw reads on-target, indicating successful enrichment of the target region. Performing an additional capture slightly increased enrichment to 99%. However, this minimal gain is unnecessary as 90% of raw reads on-target is sufficient enrichment for successful analysis. Note that raw reads are converted to DCS reads, which are typically >98% on-target.

## Supplemental Figure S5

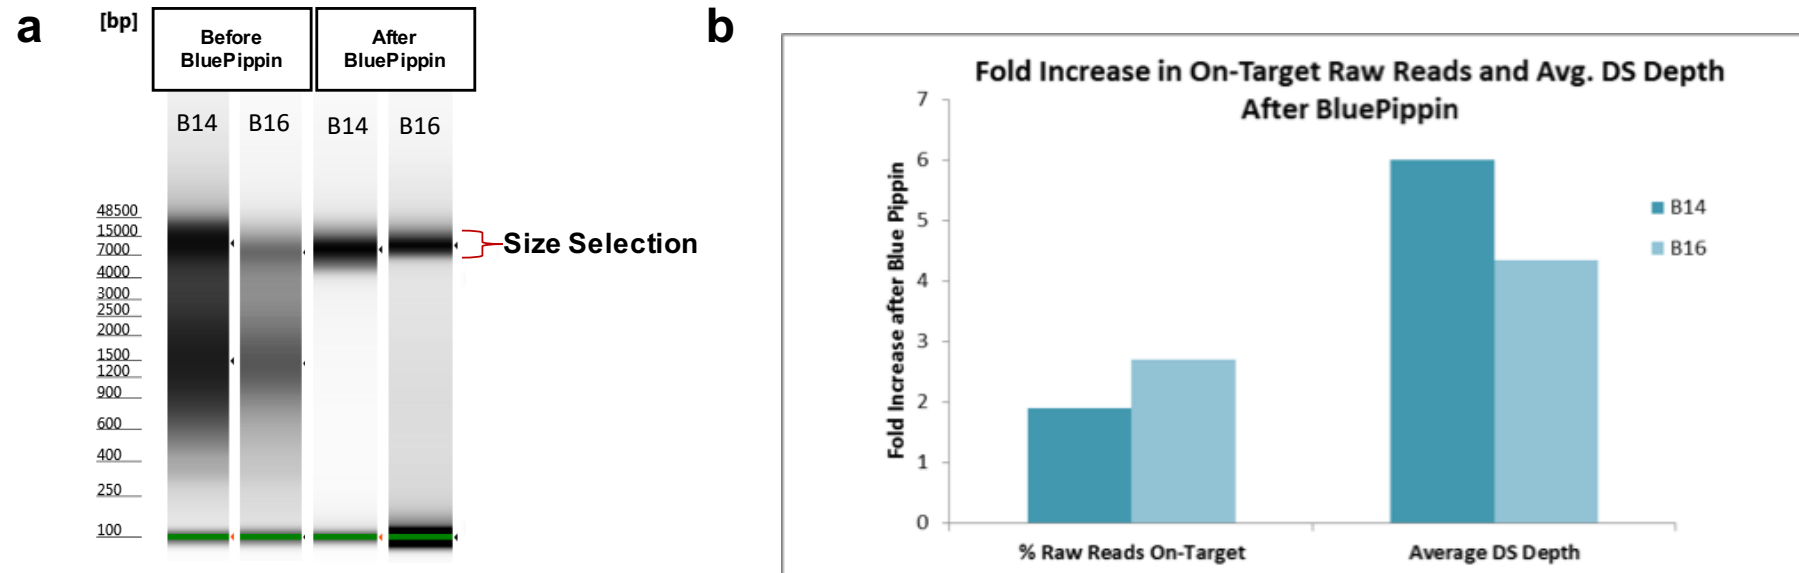

**Figure S5.** Pre-enrichment for high molecular weight (MW) DNA with BluePippin. Two samples with degraded DNA (B14, DIN=6; B16, DIN=4) were run on a BluePippin 0.75% gel cassette using high-pass setting to obtain >8kb fragments. (a) Genomic TapeStation demonstrating successful removal of lower MW DNA products by BluePippin. (b) Comparison of percentage of on-target raw reads and DCS depth for the same DNA sequenced before and after BluePippin pre-enrichment for high MW DNA. Pre-enrichment resulted in ~2-fold increase in percentage of on-target raw reads and about a 5-fold increase on average DCS depth.

Supplemental Figure S6

a

| MIXTURE | POSITION | VARIANT | EXPECTED<br>MAF | CRISPR-DS<br>MAF | STANDARD-<br>DS MAF |
|---------|----------|---------|-----------------|------------------|---------------------|
| 1:1     | 7577407  | A>C     | 0.610           | 0.596            | 0.607               |
| 1:1     | 7577427  | G>A     | 0.610           | 0.595            | 0.626               |
| 1:1     | 7578275  | G>A     | 0.219           | 0.218            | 0.199               |
| 1:1     | 7579472  | G>C     | 0.338           | 0.330            | 0.349               |
| 1:1     | 7579619  | G>T     | 0.052           | 0.046            | 0.047               |
| 1:1     | 7579801  | G>C     | 0.346           | 0.365            | 0.342               |
| 1:10    | 7577407  | A>C     | 0.522           | 0.509            | 0.528               |
| 1:10    | 7577427  | G>A     | 0.522           | 0.509            | 0.566               |
| 1:10    | 7578275  | G>A     | 0.044           | 0.032            | 0.027               |
| 1:10    | 7579472  | G>C     | 0.466           | 0.473            | 0.472               |
| 1:10    | 7579619  | G>T     | 0.010           | 0.009            | 0.008               |
| 1:10    | 7579801  | G>C     | 0.477           | 0.445            | 0.438               |
| 1:100   | 7577407  | A>C     | 0.502           | 0.513            | 0.492               |
| 1:100   | 7577427  | G>A     | 0.502           | 0.514            | 0.476               |
| 1:100   | 7578275  | G>A     | 0.004           | 0.001            | 0.002               |
| 1:100   | 7579472  | G>C     | 0.494           | 0.505            | 0.488               |
| 1:100   | 7579619  | G>T     | 0.001           | 0.002            | 0.001               |
| 1:100   | 7579801  | G>C     | 0.506           | 0.524            | 0.463               |
| 1:1000  | 7577407  | A>C     | 0.500           | 0.486            | 0.458               |
| 1:1000  | 7577427  | G>A     | 0.501           | 0.487            | 0.445               |
| 1:1000  | 7578275  | G>A     | 0.0004          | 0.0005           | ND                  |
| 1:1000  | 7579472  | G>C     | 0.497           | 0.488            | 0.510               |
| 1:1000  | 7579619  | G>T     | 0.0001          | ND               | ND                  |
| 1:1000  | 7579801  | G>C     | 0.509           | 0.495            | 0.489               |

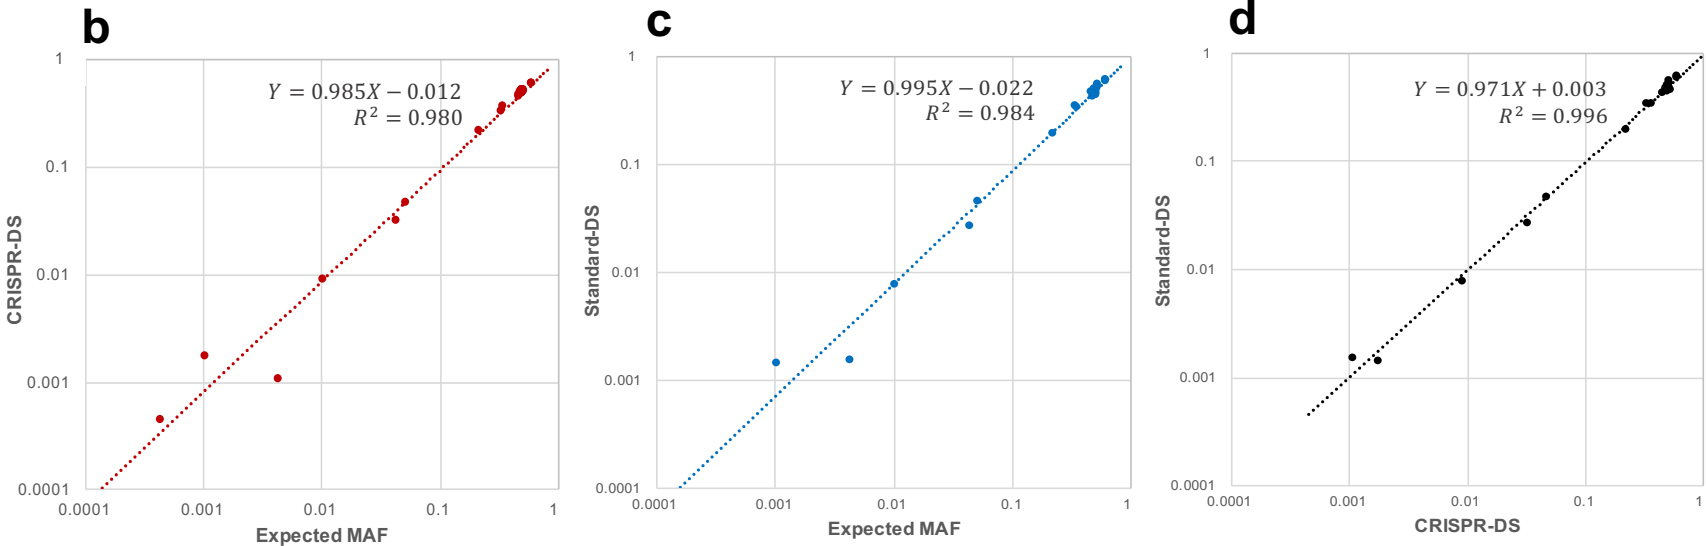

**Figure S6.** Comparison of mutant allele fraction (MAF) detected by CRISPR-DS and standard-DS. Two samples with known MAF for 6 different variants were mixed at 1:1, 1:10, 1:100 and 1:1000. The resulting mixtures were sequenced with both CRISPR-DS and standard-DS. (a) The expected MAF as well as the resulting MAF by each technique, for each variant, are reported in this table. ND: not detected. Note that the mutation at frequency 0.0001 was not expected to be detected with either method because the mean depth of sequencing was ~2,000x. (b-c) Expected MAF of mixture samples vs. MAF from sequencing samples with CRISPR-DS (red) and standard-DS (blue), with least-squares regression line shown.  $R^2 = 0.980$  and  $0.984$  respectively. (d) MAF of mixture samples sequenced with CRISPR-DS on x-axis and MAF by standard-DS on y-axis, least-squares regression line shown,  $R^2 = 0.996$ .

## Supplemental Figure S7

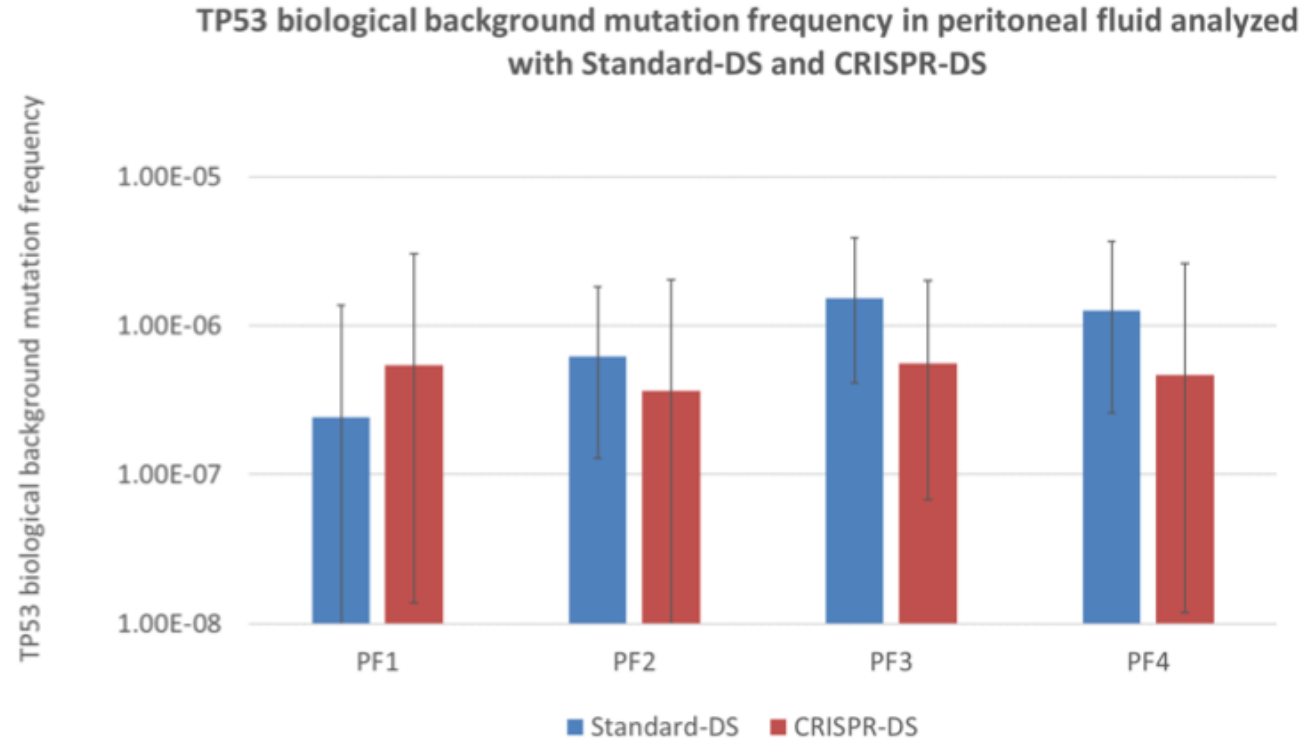

**Figure S7.** Comparison of *TP53* biological background mutation frequency measured by Standard-DS and CRISPR-DS. Four peritoneal fluid samples previously analyzed with Standard-DS were processed with CRISPR-DS. *TP53* biological background mutation was calculated as the number of *TP53* mutations not including the tumor mutation divided by the total number of nucleotides sequenced. Error bars correspond to the 95% confidence intervals calculated using the Clopper-Pearson 'exact' method for binomial distributions.



Supplemental Figure S8

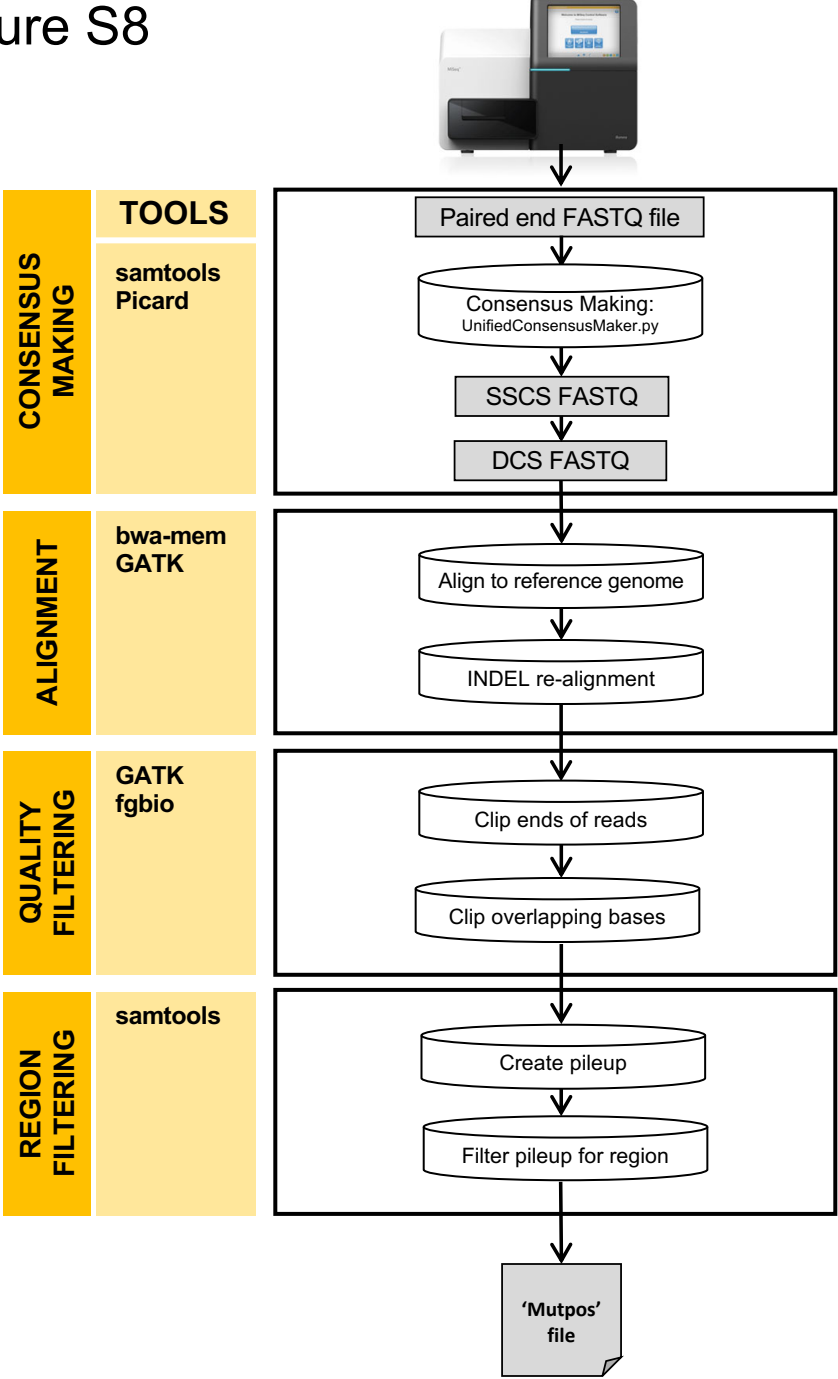

**Figure S8.** Overview of CRISPR-DS data processing. Raw FastQ files from the Illumina platform MiSeq sequencer are used to create Single Stranded Consensus Sequence (SSCS) FastQ files and double-stranded consensus sequence (DCS) FastQ files. DCS FastQ files are then aligned to the reference genome using BWA-mem, and then post-processed using GATK and fgbio software. After pileup and filtering for the region of interest, a custom python script creates a text file ('mutpos' file) with mutant calls.

# Supplemental Figure S9

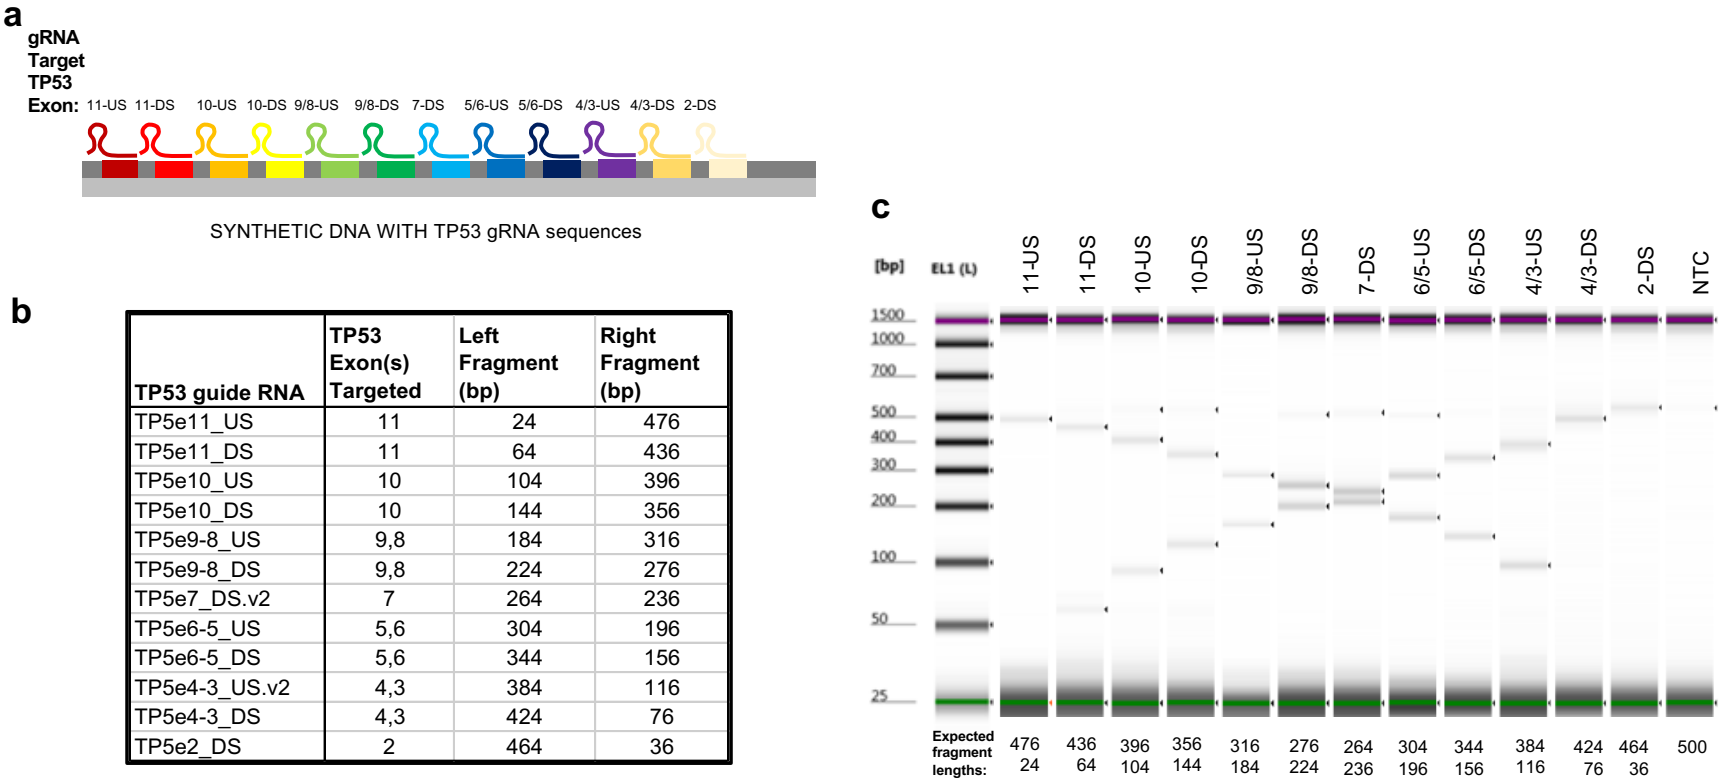

**Figure S9.** Control CRISPR/Cas9 digestion of *TP53* gRNAs. (a) A 500-bp synthetic dsDNA was designed to contain the 12 *TP53* gRNA sequences used in the study. Each guide is 23-bp long, and they are separated by 17 bp of spacer sequence. The colored boxes represent the gRNA sequence and the grey boxes represent spacer DNA sequence. (b) List of the 12 *TP53* gRNAs used in the study (as in Supplemental Table S1) and their predicted fragment lengths after cutting the synthetic DNA. (c) TapeStation gel image shows distinct bands corresponding to the expected fragment lengths for each of the gRNAs, demonstrating successful cutting.
