# Supplementary material for: Targeted genome fragmentation with CRISPR/Cas9 enables fast and efficient enrichment of small genomic regions and ultra-accurate sequencing with low DNA input (CRISPR-DS)
Source: HighWire-hosted journal article supplement (doi:10.1101/gr.235291.118), 2018-09-19
Supplement: Supplemental_Materials.docx [file Supplemental_Materials.docx]

**SUPPLEMENTAL FIGURES**

Figure S1. Timeline of library preparation for CRISPR-DS and standard-DS

Figure S2. Homopolymer region produces suboptimal sequencing near *TP53* exon 7

Figure S3. Fraction of reads within 10% of optimal insert size: CRISPR-DS vs standard-DS

Figure S4. Target enrichment for CRISPR-DS with one vs. two captures

Figure S5. Pre-enrichment for high molecular weight DNA with BluePippin

Figure S6. Comparison of mutant allele fraction detected by CRISPR-DS and standard-DS

Figure S7. Comparison of *TP53* biological background mutation frequency measured by Standard-DS and CRISPR-DS

Figure S8. Overview of CRISPR-DS data processing

Figure S9. Control CRISPR/Cas9 digestion of *TP53* gRNAs

**SUPPLEMENTAL TABLES**

Table S1. crRNA sequences for *TP53* CRISPR/Cas9 digestion

Table S2. *TP53* hybridization capture probes

Table S3. CRISPR-DS sequencing results for 15 samples processed with 250ng input DNA

**SUPPLEMENTAL DATA**

Data S1. *TP53* sequence with crRNA and capture probes

Data S2. GeneBlock sequence

**SUPPLEMENTAL CODE**

Supplemental_Code_S1.tar.gz
